# Supplementary material for: Factors associated with cancer treatment delay: a protocol for a systematic review and meta-analysis
Source: HighWire-hosted journal article supplement (doi:10.1136/bmjopen-2022-061121), 2022-06-01
Supplement: bmjopen-2022-061121supp001_data_supplement.pdf [file bmjopen-2022-061121supp001_data_supplement.pdf]

## Supplementary File 1

## Search Strategy Example:

**Ovid MEDLINE(R) and Epub Ahead of Print, In-Process, In-Data-Review & Other Non-Indexed Citations, Daily and Versions(R) <1946 to October 12, 2021>**

| #  | Searches                                                                                                                                                                                                                                                                                                                                                                                                                                    |
|----|---------------------------------------------------------------------------------------------------------------------------------------------------------------------------------------------------------------------------------------------------------------------------------------------------------------------------------------------------------------------------------------------------------------------------------------------|
| 1  | <i>exp Breast Neoplasms/</i>                                                                                                                                                                                                                                                                                                                                                                                                                |
| 2  | <i>Uterine Cervical Neoplasms/</i>                                                                                                                                                                                                                                                                                                                                                                                                          |
| 3  | <i>exp Prostatic Neoplasms/</i>                                                                                                                                                                                                                                                                                                                                                                                                             |
| 4  | <i>exp Lung Neoplasms/</i>                                                                                                                                                                                                                                                                                                                                                                                                                  |
| 5  | <i>exp Colorectal Neoplasms/</i>                                                                                                                                                                                                                                                                                                                                                                                                            |
| 6  | <i>(breast or "ductal invasive" or "lobular invasive" or cervical or cervix or prostate or prostatic or lung or pulmonary or colon or colonic or colorectal or sigmoid or bowel or rectal).tw.</i>                                                                                                                                                                                                                                          |
| 7  | <i>(neoplas* or cancer* or carcinoma* or adenocarcinoma* or tumor* or tumour* or malignan*).tw.</i>                                                                                                                                                                                                                                                                                                                                         |
| 8  | <i>6 and 7</i>                                                                                                                                                                                                                                                                                                                                                                                                                              |
| 9  | <i>or/1-5,8</i>                                                                                                                                                                                                                                                                                                                                                                                                                             |
| 10 | <i>"time-to-treatment"/ or "time to treatment".tw.</i>                                                                                                                                                                                                                                                                                                                                                                                      |
| 11 | <i>(delay* adj5 (treatment or care)).tw.</i>                                                                                                                                                                                                                                                                                                                                                                                                |
| 12 | <i>("treatment initiation" and delay*).tw.</i>                                                                                                                                                                                                                                                                                                                                                                                              |
| 13 | <i>((timeliness or timely) adj5 (treatment or therapy or surg* or resection or radiosurg* or chemo* or radiotherapy or radiation or cryoablation or ablation or brachytherapy or immunotherapy or "androgen deprivation" or tumorectomy or tumourectomy or lumpectomy or mastectomy or trachelectomy or hysterectomy or prostatectomy or colectomy or hemicolectomy or sigmoidectomy or proctectomy or lobectomy or pneumonectomy)).tw.</i> |
| 14 | <i>(delay* and (time adj5 (treatment or therapy or surg* or resection or radiosurg* or chemo* or radiotherapy or radiation or cryoablation or ablation or brachytherapy or immunotherapy or "androgen deprivation" or tumorectomy or tumourectomy or lumpectomy or mastectomy or trachelectomy or hysterectomy or prostatectomy or colectomy or hemicolectomy or sigmoidectomy or proctectomy or lobectomy or pneumonectomy))).tw.</i>      |
| 15 | <i>or/10-14</i>                                                                                                                                                                                                                                                                                                                                                                                                                             |
| 16 | <i>"time factors"/</i>                                                                                                                                                                                                                                                                                                                                                                                                                      |
| 17 | <i>"waiting lists"/</i>                                                                                                                                                                                                                                                                                                                                                                                                                     |
| 18 | <i>(16 or 17) and delay*.tw.</i>                                                                                                                                                                                                                                                                                                                                                                                                            |
| 19 | <i>("time interval" and delay*).tw.</i>                                                                                                                                                                                                                                                                                                                                                                                                     |
| 20 | <i>((time or timely or timeliness) adj3 initiation).tw.</i>                                                                                                                                                                                                                                                                                                                                                                                 |

|    |                                                                                                                                                                                                                    |
|----|--------------------------------------------------------------------------------------------------------------------------------------------------------------------------------------------------------------------|
| 21 | <i>(delay* adj3 initiation).tw.</i>                                                                                                                                                                                |
| 22 | <i>((prolonged or long or longer) adj3 ("wait time*" or "waiting time")).tw.</i>                                                                                                                                   |
| 23 | <i>(delay* adj3 time).tw.</i>                                                                                                                                                                                      |
| 24 | <i>(patient* adj2 delay*).tw.</i>                                                                                                                                                                                  |
| 25 | <i>((provider* or system* or physician* or doctor*) adj2 delay*).tw.</i>                                                                                                                                           |
| 26 | <i>or/18-25</i>                                                                                                                                                                                                    |
| 27 | <i>Therapeutics/</i>                                                                                                                                                                                               |
| 28 | <i>(therapy or "drug therapy" or surgery or radiotherapy).fs.</i>                                                                                                                                                  |
| 29 | <i>exp Combined Modality Therapy/</i>                                                                                                                                                                              |
| 30 | <i>exp Drug Therapy/</i>                                                                                                                                                                                           |
| 31 | <i>exp Antineoplastic Agents/</i>                                                                                                                                                                                  |
| 32 | <i>exp Antibodies, Monoclonal/</i>                                                                                                                                                                                 |
| 33 | <i>exp Immunotherapy/</i>                                                                                                                                                                                          |
| 34 | <i>exp Radiotherapy/</i>                                                                                                                                                                                           |
| 35 | <i>exp Surgical Procedures, Operative/</i>                                                                                                                                                                         |
| 36 | <i>(treatment or therapy or surg* or resection or radiosurg* or chemo* or radiotherapy or radiation or cryoablation or ablation or brachytherapy or immunotherapy or "androgen deprivation").tw.</i>               |
| 37 | <i>(tumorectomy or tumourectomy or lumpectomy or mastectomy or trachelectomy or hysterectomy or prostatectomy or colectomy or hemicolectomy or sigmoidectomy or proctectomy or lobectomy or pneumonectomy).tw.</i> |
| 38 | <i>or/27-37</i>                                                                                                                                                                                                    |
| 39 | <i>26 and 38</i>                                                                                                                                                                                                   |
| 40 | <i>9 and (15 or 39)</i>                                                                                                                                                                                            |
| 41 | <i>risk factors/</i>                                                                                                                                                                                               |
| 42 | <i>exp socioeconomic factors/</i>                                                                                                                                                                                  |
| 43 | <i>"social determinants of health"/</i>                                                                                                                                                                            |
| 44 | <i>health care disparities/</i>                                                                                                                                                                                    |
| 45 | <i>health status disparities/</i>                                                                                                                                                                                  |
| 46 | <i>health equity/</i>                                                                                                                                                                                              |
| 47 | <i>health services accessibility/</i>                                                                                                                                                                              |
| 48 | <i>vulnerable populations/</i>                                                                                                                                                                                     |
| 49 | <i>social class/</i>                                                                                                                                                                                               |
| 50 | <i>exp culture/</i>                                                                                                                                                                                                |
| 51 | <i>exp ethnic groups/ or ethnology.fs.</i>                                                                                                                                                                         |
| 52 | <i>minority groups/</i>                                                                                                                                                                                            |

|    |                                                                                                                |
|----|----------------------------------------------------------------------------------------------------------------|
| 53 | <i>exp disabled persons/</i>                                                                                   |
| 54 | <i>exp aged/ or age factors/</i>                                                                               |
| 55 | <i>mental disorders/</i>                                                                                       |
| 56 | <i>body mass index/</i>                                                                                        |
| 57 | <i>insurance coverage/ or uninsured/ or medically uninsured/ or medicare/ or medicaid/</i>                     |
| 58 | <i>fees, medical/</i>                                                                                          |
| 59 | <i>income/</i>                                                                                                 |
| 60 | <i>"Patient Acceptance of Health Care"/</i>                                                                    |
| 61 | <i>Health Knowledge, Attitudes, Practice/</i>                                                                  |
| 62 | <i>exp information literacy/</i>                                                                               |
| 63 | <i>language/</i>                                                                                               |
| 64 | <i>exp religion/</i>                                                                                           |
| 65 | <i>exp marital status/</i>                                                                                     |
| 66 | <i>(factors or reasons or barrier* or determinant* or predictor* or characteristics or "risk factor*").tw.</i> |
| 67 | <i>(inequalit* or inequit* or equit* or disparit*).tw.</i>                                                     |
| 68 | <i>(socioeconomic or socio-economic or SES or sociodemographic or socio-demographic).tw.</i>                   |
| 69 | <i>(minorities or minoritized or race or racial or ethnic* or underserved).tw.</i>                             |
| 70 | <i>(cultur* or belief* or relig*).tw.</i>                                                                      |
| 71 | <i>(fear or denial).tw.</i>                                                                                    |
| 72 | <i>(education* or misconception or literacy or illiterate).tw.</i>                                             |
| 73 | <i>age*.tw.</i>                                                                                                |
| 74 | <i>(gender or sex).tw.</i>                                                                                     |
| 75 | <i>("marital status" or marriage or unmarried).tw.</i>                                                         |
| 76 | <i>("mental disorder*" or "mental illness").tw.</i>                                                            |
| 77 | <i>(disabled or disabilit*).tw.</i>                                                                            |
| 78 | <i>("body mass index" or BMI).tw.</i>                                                                          |
| 79 | <i>(language or non-english).tw.</i>                                                                           |
| 80 | <i>(insurance or uninsured or medicare or medicaid).tw.</i>                                                    |
| 81 | <i>(income or financial or costs or fees or affordability).tw.</i>                                             |
| 82 | <i>(transportation or travel* or access or accessibility).tw.</i>                                              |
| 83 | <i>(system or facility).tw.</i>                                                                                |
| 84 | <i>"social support".tw.</i>                                                                                    |
| 85 | <i>or/41-84</i>                                                                                                |
| 86 | <i>40 and 85</i>                                                                                               |

|    |                                      |
|----|--------------------------------------|
| 87 | <i>limit 86 to yr="2000-Current"</i> |
|----|--------------------------------------|
